# Supplementary material
Source: MDPI journal article supplement (https://www.mdpi.com/1999-4907/8/12/488)

Supplemental figure 1: Changes in survival rates(%) from 1 day to 60 days under different NaCl concentrations(0%,0.1%,0.2%,0.3%,0.5%,0.7% and 0.9%), One year old seedlings began to die since the 3<sup>rd</sup> day, and the survival rates keep stable on the 21<sup>th</sup> day.

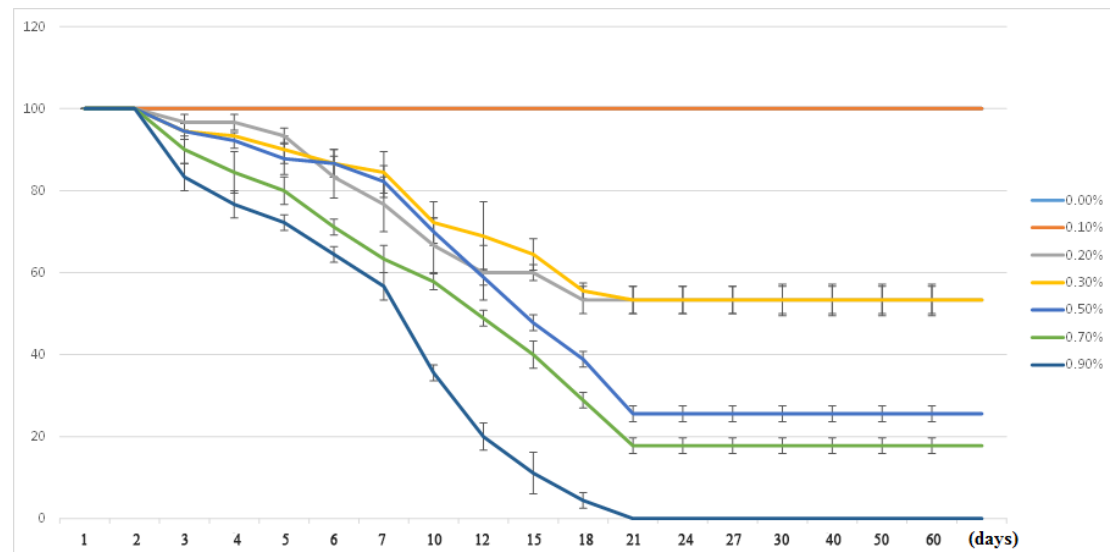

Supplement: s1 [file s1]
